# Supplementary material
Source: Springer Nature journal article supplement (https://www.springermedizin.de/resource/supplementary/12985_2010_1082_MOESM6_ESM.pdf/9609104)
Supplement: MOESM6 [file 9609104]

## Genome segment ISAV strain

Sequence is in 5' to 3' orientation

1 10 20 30 40

|           |             |            |                                                  |
|-----------|-------------|------------|--------------------------------------------------|
| Segment 1 | NBISA01     | (HQ011270) | AGCTAAGA                                         |
| Segment 1 | ADL-ISAV-07 | (HQ011262) | AGCTAAGA                                         |
| Segment 2 | NBISA01     | (HQ011271) | AGCAAAGAACGCTCTTTAATAACC                         |
| Segment 2 | ADL-ISAV-07 | (HQ011263) | AGCAAAGAACGCTCTTTAATAACC                         |
| Segment 3 | NBISA01     | (HQ011272) | AGCAAAGATTGCTCAAATCCCAAAAATAATACAGAAAACGTATAAGAG |
| Segment 3 | ADL-ISAV-07 | (HQ011264) | AGCAAAGATTGCTCAAATCCCAAAAATAATACAGAAAACGTATAAGAG |
| Segment 4 | NBISA01     | (HQ011273) | AGCTAAGATTGGCTATTTTCAAG                          |
| Segment 4 | ADL-ISAV-07 | (HQ011265) | AGCTAAGATTGGCT-GTTTCAAG                          |
| Segment 5 | NBISA01     | (HQ011274) | AGTTAAAG                                         |
| Segment 5 | ADL-ISAV-07 | (HQ011266) | AGTTAAAG                                         |
| Segment 6 | NBISA01     | (HQ011275) | AGCAAAG                                          |
| Segment 6 | ADL-ISAV-07 | (HQ011267) | --CAAAG                                          |
| Segment 7 | NBISA01     | (HQ011276) | AGCTAAGATTCTCCTTCTACA                            |
| Segment 7 | ADL-ISAV-07 | (HQ011268) | AGCTAAGATTCTCCTTCTACA                            |
| Segment 8 | NBISA01     | (HQ011277) | AGCAAAGATTGGCTATTTACC                            |
| Segment 8 | ADL-ISAV-07 | (HQ011269) | AGCAAAGGTTGGCTATCTACC                            |
